# Supplementary material for: A-REST (Activity to Reduce Excessive Sitting Time): A Feasibility Trial to Reduce Prolonged Sitting in Police Staff
Source: Preprints.org preprint supplement (doi:10.20944/preprints202206.0185.v1), 2022-06-13
Supplement: Supplementary file 1 [file supplementary]

Supplement 1. Consolidation Standards of Reporting Trials (CONSORT) extension to randomised pilot and feasibility trials for the A-REST study

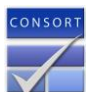

## CONSORT 2010 checklist of information to include when reporting a pilot or feasibility trial\*

| Section/ Topic            | Item No | Checklist item                                                                                                                                      | Reported on page No  |
|---------------------------|---------|-----------------------------------------------------------------------------------------------------------------------------------------------------|----------------------|
| <b>Title and abstract</b> |         |                                                                                                                                                     |                      |
|                           | 1a      | Identification as a pilot or feasibility randomised trial in the title                                                                              | TITLE                |
|                           | 1b      | Structured summary of pilot trial design, methods, results, and conclusions (for specific guidance see CONSORT abstract extension for pilot trials) | ABSTRACT             |
| <b>Introduction</b>       |         |                                                                                                                                                     |                      |
| Background and objectives | 2a      | Scientific background and explanation of rationale for future definitive trial, and reasons for randomised pilot trial                              | INTRODUCTION         |
|                           | 2b      | Specific objectives or research questions for pilot trial                                                                                           | INTRODUCTION         |
| <b>Methods</b>            |         |                                                                                                                                                     |                      |
| Trial design              | 3a      | Description of pilot trial design (such as parallel, factorial) including allocation ratio                                                          | DESIGN & FIGURE 1    |
|                           | 3b      | Important changes to methods after pilot trial commencement (such as eligibility criteria), with reasons                                            | RESULTS              |
| Participants              | 4a      | Eligibility criteria for participants                                                                                                               | ELIGIBILITY CRITERIA |
|                           | 4b      | Settings and locations where the data were collected                                                                                                | STUDY SETTING        |
|                           | 4c      | How participants were identified and consented                                                                                                      | RECRUITMENT, RESULTS |

|                                  |     |                                                                                                                                                                                             |                                                               |
|----------------------------------|-----|---------------------------------------------------------------------------------------------------------------------------------------------------------------------------------------------|---------------------------------------------------------------|
| Interventions                    | 5   | The interventions for each group with sufficient details to allow replication, including how and when they were actually administered                                                       | INTERVENTION, FIGURE 5 (CONSORT DIAGRAM), & TIDIER (APPENDIX) |
| Outcomes                         | 6a  | Completely defined prespecified assessments or measurements to address each pilot trial objective specified in 2b, including how and when they were assessed                                | OUTCOMES                                                      |
|                                  | 6b  | Any changes to pilot trial assessments or measurements after the pilot trial commenced, with reasons                                                                                        | N/A                                                           |
|                                  | 6c  | If applicable, prespecified criteria used to judge whether, or how, to proceed with future definitive trial                                                                                 | N/A                                                           |
| Sample size                      | 7a  | Rationale for numbers in the pilot trial                                                                                                                                                    | RECRUITMENT                                                   |
|                                  | 7b  | When applicable, explanation of any interim analyses and stopping guidelines                                                                                                                | N/A                                                           |
| Randomisation:                   |     |                                                                                                                                                                                             |                                                               |
| Sequence generation              | 8a  | Method used to generate the random allocation sequence                                                                                                                                      | N/A                                                           |
|                                  | 8b  | Type of randomisation(s); details of any restriction (such as blocking and block size)                                                                                                      | N/A                                                           |
| Allocation concealment mechanism | 9   | Mechanism used to implement the random allocation sequence (such as sequentially numbered containers), describing any steps taken to conceal the sequence until interventions were assigned | N/A                                                           |
| Implementation                   | 10  | Who generated the random allocation sequence, who enrolled participants, and who assigned participants to interventions                                                                     | N/A                                                           |
| Blinding                         | 11a | If done, who was blinded after assignment to interventions (for example, participants, care providers, those assessing outcomes) and how                                                    | N/A                                                           |
|                                  | 11b | If relevant, description of the similarity of interventions                                                                                                                                 | N/A                                                           |
| Statistical methods              | 12  | Methods used to address each pilot trial objective whether qualitative or quantitative                                                                                                      | ANALYSES                                                      |
| <b>Results</b>                   |     |                                                                                                                                                                                             |                                                               |
| Participant flow (a diagram is   | 13a | For each group, the numbers of participants who were approached and/or assessed for eligibility, randomly assigned, received intended treatment, and were assessed for each objective       | PARTICIPANT CHARACTERISTICS                                   |

|                          |     |                                                                                                                                                                                |                                  |
|--------------------------|-----|--------------------------------------------------------------------------------------------------------------------------------------------------------------------------------|----------------------------------|
| strongly recommended)    | 13b | For each group, losses and exclusions after randomisation, together with reasons                                                                                               | Figure 5 (CONSORT DIAGRAM)       |
| Recruitment              | 14a | Dates defining the periods of recruitment and follow-up                                                                                                                        | FIGURE 4 (RECRUITMENT FLOWCHART) |
|                          | 14b | Why the pilot trial ended or was stopped                                                                                                                                       | N/A                              |
| Baseline data            | 15  | A table showing baseline demographic and clinical characteristics for each group                                                                                               | TABLES 4 & 5                     |
| Numbers analysed         | 16  | For each objective, number of participants (denominator) included in each analysis. If relevant, these numbers should be by randomised group                                   | TABLES 6 & 7                     |
| Outcomes and estimation  | 17  | For each objective, results including expressions of uncertainty (such as 95% confidence interval) for any estimates. If relevant, these results should be by randomised group | TABLES 4,5,6 & 7                 |
| Ancillary analyses       | 18  | Results of any other analyses performed that could be used to inform the future definitive trial                                                                               | SECONDARY OUTCOMES               |
| Harms                    | 19  | All important harms or unintended effects in each group (for specific guidance see CONSORT for harms)                                                                          | PRIMARY OUTCOMES                 |
|                          | 19a | If relevant, other important unintended consequences                                                                                                                           | N/A                              |
| <b>Discussion</b>        |     |                                                                                                                                                                                |                                  |
| Limitations              | 20  | Pilot trial limitations, addressing sources of potential bias and remaining uncertainty about feasibility                                                                      | LIMITATIONS                      |
| Generalisability         | 21  | Generalisability (applicability) of pilot trial methods and findings to future definitive trial and other studies                                                              | DISCUSSION                       |
| Interpretation           | 22  | Interpretation consistent with pilot trial objectives and findings, balancing potential benefits and harms, and considering other relevant evidence                            | DISCUSSION                       |
|                          | 22a | Implications for progression from pilot to future definitive trial, including any proposed amendments                                                                          | DISCUSSION                       |
| <b>Other information</b> |     |                                                                                                                                                                                |                                  |
| Registration             | 23  | Registration number for pilot trial and name of trial registry                                                                                                                 | STUDY DESIGN                     |

|          |    |                                                                                               |                                           |
|----------|----|-----------------------------------------------------------------------------------------------|-------------------------------------------|
| Protocol | 24 | Where the pilot trial protocol can be accessed, if available                                  | THESIS CHAPTER 7<br>(INTERVENTION DESIGN) |
| Funding  | 25 | Sources of funding and other support (such as supply of drugs),<br>role of funders            | N/A                                       |
|          | 26 | Ethical approval or approval by research review committee,<br>confirmed with reference number | STUDY DESIGN                              |

Citation: Eldridge SM, Chan CL, Campbell MJ, Bond CM, Hopewell S, Thabane L, et al. CONSORT 2010 statement: extension to randomised pilot and feasibility trials. BMJ. 2016;355.

\*We strongly recommend reading this statement in conjunction with the CONSORT 2010, extension to randomised pilot and feasibility trials, Explanation and Elaboration for important clarifications on all the items. If relevant, we also recommend reading CONSORT extensions for cluster randomised trials, non-inferiority and equivalence trials, non-pharmacological treatments, herbal interventions, and pragmatic trials. Additional extensions are forthcoming: for those and for up to date references relevant to this checklist, see [www.consort-statement.org](http://www.consort-statement.org).

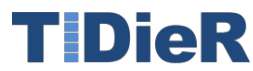

## A-REST Study: Activity to Reduce Excessive Sitting Time

**Why:** The primary aim of this study is to assess the feasibility of an intervention to reduce and break up prolonged sitting time in fulltime police staff. The secondary aims of this study are to assess preliminary effects on patterns of sedentary behaviour (number of breaks, number of prolonged sitting bouts, average duration of prolonged sitting bouts, and total prolonged sitting duration), additional measures of sedentary behaviour (total sitting time, standing, and stepping), cardiometabolic risk markers, physiological stress (cortisol levels), physical health (self-report and postural stability), psychological wellbeing and mood, work stress (self-reported), and work performance (job satisfaction and productivity). The development of the current intervention follows the steps outlined by the Behaviour Change Wheel (Michie, van Stralen, & West, 2011).

**What (material):** BEHAVIOUR CHANGE BOOKLET - A behaviour change booklet was developed and adapted from the Active Herts project (Howlett, Jones, Bain, & Chater, 2017) and provides information on health consequences, goal setting, implementation intentions and additional behaviour change techniques related to breaking up and reducing sitting time (booklet provided in the Appendices of the protocol document). Intervention group participants will receive a physical copy of the booklet.

QR CODES - QR codes will be laminated, approximately 3"x 3", and printed in black and white (example provided in the Appendices of the protocol document). These will be adhered to the wall at chest height at various locations in the building near intervention clusters. Codes will be located such that they facilitate a three-minute break (including the time to scan and log the break). Once locations have been decided jointly by participants and the researchers, an electronic map (pdf) will be emailed to participants by health champions to designate where these codes are located.

RISE & RECHARGE® APP - The Rise & Recharge® app (Baker Institute, Melbourne, Australia) monitors, records and rewards performance of the behaviour (taking breaks) with virtual 'badges' (stars). Participants will earn one star for every eight breaks performed.

Breaks are automatically logged via the smartphone's accelerometer. Activity and star count are visually presented in realtime. The app also provides information on health consequences and other behaviour change techniques (BCTs) which are identified in the protocol document in a BCT table.

EMAILS - Weekly email correspondence sent from the health champions will include the weekly leaderboard standings for teams and a personalised support message (Dunstan et al., 2013). The emails will also let the participants know what the timeline is of the intervention. An email template is provided in the Appendices of the protocol document.

**What (procedures):** The intervention group will aim to regularly break up their prolonged sitting time with three-minute incidental movement breaks every half hour at work. The intervention will support this behavioural change with a short educational lecture, a brainstorming workshop, a behaviour change booklet, computer break prompts, QR codes to log breaks, use of the Rise & Recharge® app for self-monitoring and individual feedback on behaviour, team competition, health champions, and weekly email communication.

SHORT LECTURE - A short lecture (15 minutes) will be delivered in person (by Marsha Brierley) to intervention participants after baseline measurements have been taken. The researcher will deliver the lecture to provide information on health consequences and to allow for questions. It may be necessary to accommodate shift patterns with a second lecture.

WORKSHOP - The workshop (30 minutes) will take place directly after the lecture and consist of instruction on how to perform the behaviour, demonstration of the behaviour, setting common (team) goals, and completion of the behaviour change booklet (see item 3 for details). It should be noted that the intervention may vary slightly depending on goals set by participants during the workshop session. These changes are not anticipated to significantly alter the intervention but consist of changes like the exact positioning of QR codes (locations to be decided on jointly by participants and the researchers), the point value of codes, and whether to incorporate breaks during meeting times. Health champions will stay on (15 minutes) to receive additional training (see 'HEALTH CHAMPIONS' below for details).

BEHAVIOUR CHANGE BOOKLET - See 'WORKSHOP', above.

COMPUTER PROMPTS - Participants will set electronic prompts to remind them to take their breaks. Prompts will ideally be set to every 30 minutes but may vary according to individual and team goals set during the workshop.

QR CODES - To record and monitor breaking up prolonged sitting time QR codes will be placed in various locations in the building (locations

decided on jointly by participants and the researchers during the workshop). On each break, participants will scan a code using their smartphone and enter their participant number to log their break. Codes will be located such that they facilitate a three-minute break (including the time to scan and log the break). Once locations have been decided jointly by participants and the researchers, an electronic map (pdf) will be emailed to participants by health champions to designate where these codes are located.

**RISE & RECHARGE® APP** - On an individual level, participants will use the Rise & Recharge® app (Baker Institute, Melbourne, Australia) to encourage habit reversal and behaviour substitution by rewarding performance of the behaviour (taking breaks) with virtual 'badges' (stars). Participants will earn one star for every eight breaks performed. Breaks are automatically logged via the smartphone's accelerometer. Activity and star count feedback on behaviour are visually presented in real-time.

**HEALTH CHAMPIONS** - A person will volunteer from each cluster to serve as a point of contact for questions from team members, to send out weekly emails (see 'EMAILS' in item 3), and act as a role model for the target behaviour (Dunstan et al., 2013; O'Connell et al., 2015). Health champions will receive additional training during the workshop (15 minutes) with regards to setting up computer prompts, setting up their team email contact list, and personalising the weekly emails (see 'EMAILS' in item 3). NOTE: The intervention was modified to not have health champions, but instead, utilise the research liaison for email personalisation during the intervention (fidelity).

**TEAM COMPETITION** - Team competition will take place to reward participation. Each QR code will be worth points and the winning team will be determined by total points earned every week. All participants will be informed of their team's performance via a weekly leaderboard (see 'EMAILS' in item 3).

**EMAILS** - Weekly email correspondence sent from the health champions will include the weekly leaderboard standings for teams and a personalised support message (Dunstan et al., 2013). The emails will also let the participants know what the timeline is of the intervention. Health champions will be reminded via email or text message (sent by Marsha Brierley) to send their email to their cluster every week. Researchers will be copied in on the emails to monitor fidelity.

|                                                     |                                                                                                                                                                                                                                                                                                                                                                                                                                                                                                                                                                                                                                                                                                                                                                                                                                                                    |
|-----------------------------------------------------|--------------------------------------------------------------------------------------------------------------------------------------------------------------------------------------------------------------------------------------------------------------------------------------------------------------------------------------------------------------------------------------------------------------------------------------------------------------------------------------------------------------------------------------------------------------------------------------------------------------------------------------------------------------------------------------------------------------------------------------------------------------------------------------------------------------------------------------------------------------------|
| <b>Who provided:</b>                                | The intervention elements of lecture, workshop, email reminders to health champions, will be delivered by Marsha Brierley (MB), a PhD candidate with experience in sedentary behaviour change. Pre/post assessments will be undertaken by the laboratory-trained research team (students and staff in the Institute for Sport and Physical Activity Research, School of Sport Science and Physical Activity). Health champions will be given their training by MB (see 'HEALTH CHAMPIONS' in item 4 for more details).                                                                                                                                                                                                                                                                                                                                             |
| <b>How (mode of delivery; individual or group):</b> | <p>The 3-minute breaks will be taken individually by participants. They may be encouraged to take breaks together via their respective health champion.</p> <p>SHORT LECTURE - Face-to-face delivery to group.</p> <p>WORKSHOP - Face-to-face delivery to group.</p> <p>BEHAVIOUR CHANGE BOOKLET - Physical copy. Individual delivery (participants receive and complete their own booklet) in a group setting (where booklet elements are discussed).</p> <p>COMPUTER PROMPTS - Electronic delivery via individual computers.</p> <p>QR CODES - Physical laminated paper. Individual delivery.</p> <p>RISE &amp; RECHARGE® APP - Electronic delivery via a smartphone application to individuals.</p> <p>HEALTH CHAMPIONS - N/A.</p> <p>TEAM COMPETITION - Results delivered via group email (see 'EMAILS' below).</p> <p>EMAILS - Electronic group delivery.</p> |
| <b>Where:</b>                                       | The intervention will take place at the offices of Bedfordshire Police Force. To prevent cross-contamination, intervention and control clusters will be located in different teams and physically separated by walls, floors or buildings (Danquah et al., 2016). Office types of participants (e.g., open plan) will be recorded in the demographic survey and presented in the results.                                                                                                                                                                                                                                                                                                                                                                                                                                                                          |



**When and how much:** The schedule of events is as follows:

The intervention will be 10-weeks long. Before the first week of the intervention begins, there will be a short lecture (15 minutes) followed by a workshop (30 minutes) followed by health champion training (15 minutes). During weeks 1-10, participants will receive computer prompts every 30 minutes while at work. Participants will be asked to take a 3-minute break every half hour when prompted and scan a QR code. Participants may access behavioural feedback and reward (stars earned) in the Rise & Recharge® app at will during the intervention. On the first day of every week of the intervention (e.g., Monday), participants will receive an email with leaderboard standings and a management support message (10 emails in total).

**Tailoring:** This intervention is designed to be flexible and support individual pathways to behaviour change. In other words, all participants will be provided the same materials, the same support, but how they choose to engage with these is up to them. For example, some participants may choose to ignore the computer prompts because they prefer to remember to take a break without a prompt. These kinds of adaptations are anticipated and will be assessed in an exit interview.

**How well (planned):** Fidelity is important to consider in complex interventions in order to strengthen interpretation of the results. Bellg et al. (2004) identified five theoretical elements to intervention fidelity: study design, training of the provider(s), delivery by the provider, receipt of the intervention, and enactment of the behaviour. This framework not only complements feasibility reporting but will also be useful for interpretation of the preliminary effects of the study [sedentary behaviour, cardiometabolic risk markers, physiological stress (cortisol levels), physical health (self-report and postural stability), psychological wellbeing and mood, work stress (self-reported), and work performance (job satisfaction and job performance)]. A breakdown of how fidelity will be assessed is provided in the protocol document in the section titled 'FIDELITY'.

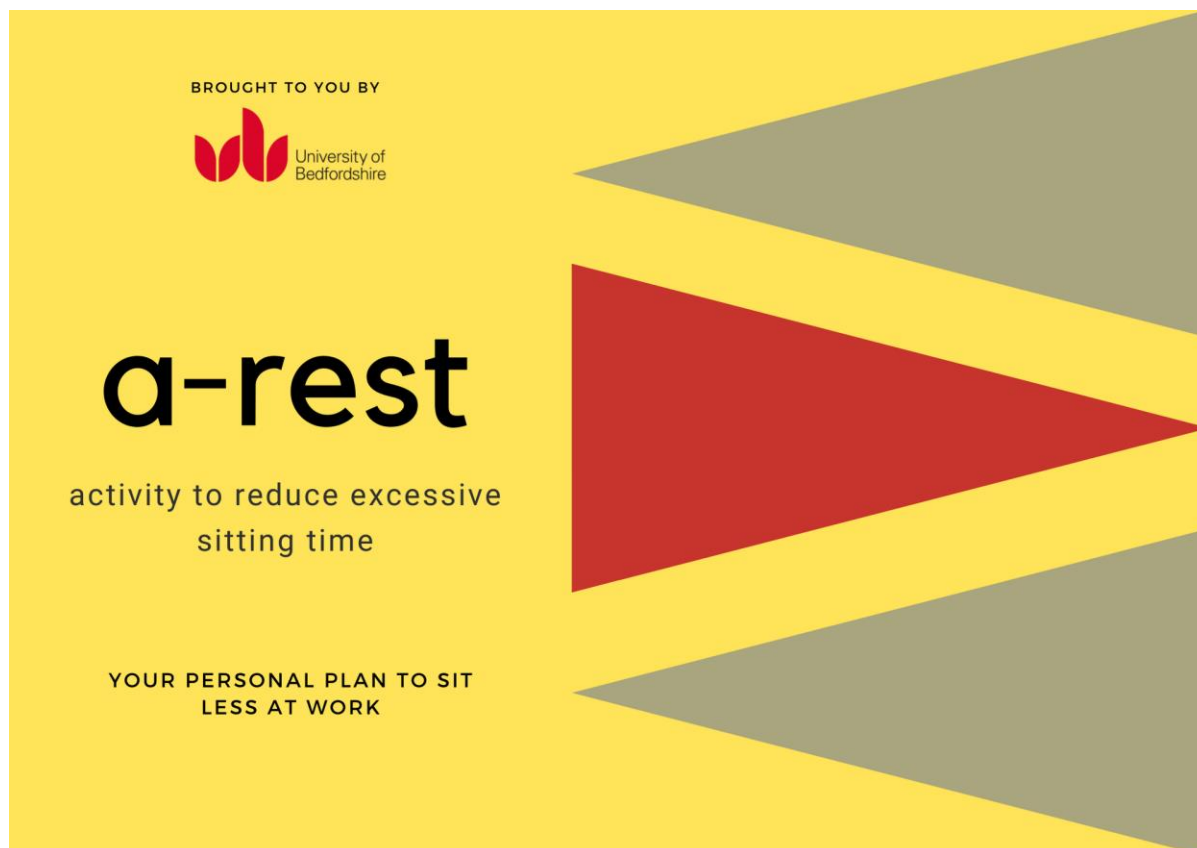

## ABOUT A-REST

A-REST (Activity to Reduce Excessive Sitting Time) is an intervention specifically designed for police staff to help make small, lasting changes to the way you work. The idea is to incorporate short, frequent breaks throughout the workday.

Habits are a big part of this and changing them will help to improve your health and wellbeing.

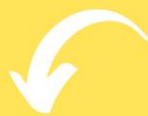

### Keeping in touch

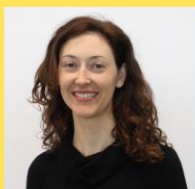

Marsha Brierley  
[phone number]  
marsha.brierley@study.beds.ac.uk

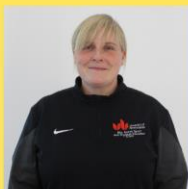

Dr Lindsey Smith  
lindsey.smith@beds.ac.uk

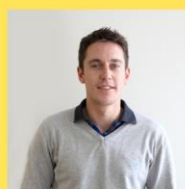

Dr Daniel Bailey  
Daniel.bailey@beds.ac.uk

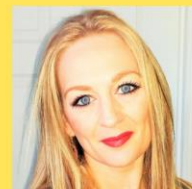

Dr Angel Chater  
angel.chater@beds.ac.uk

## IS REDUCING YOUR SITTING TIME GOOD FOR YOU?

Consider the possible positives and negatives of breaking up and reducing your sitting time throughout the workday by filling in the boxes.

| Pros | Cons |
|------|------|
|      |      |

On a scale of 1 – 10, how confident do you feel about reducing your prolonged sitting?

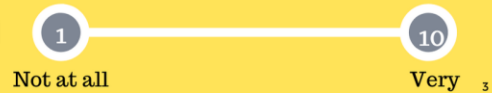

## YOUR THOUGHTS

About sitting time at work

4

## HURDLES TO JUMP OVER

# OVERCOMING YOUR BARRIERS

Think about your current situation. What things in your life might be hurdles that stop you from breaking up and reducing your sitting time at work?

**WHAT'S CURRENTLY STOPPING YOU?**

- 
- 
- 

**HOW CAN YOU OVERCOME THIS?**

- 
- 
- 

5

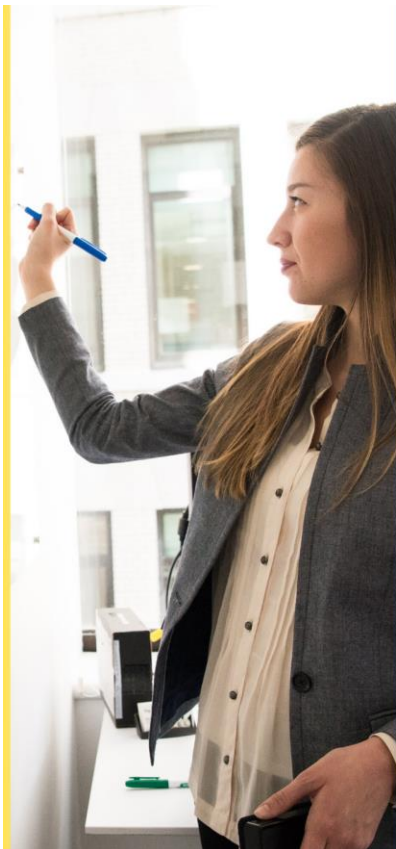

## NEW HABITS

# Make it a routine

*Create a timetable or mindmap to identify opportunities in your day/week to reduce how long you sit at any one time. Start small and slowly build up a solid routine. Think about how you could do something different.*

*Remember sitting less than 30-mins at a time will start to make a big difference!*

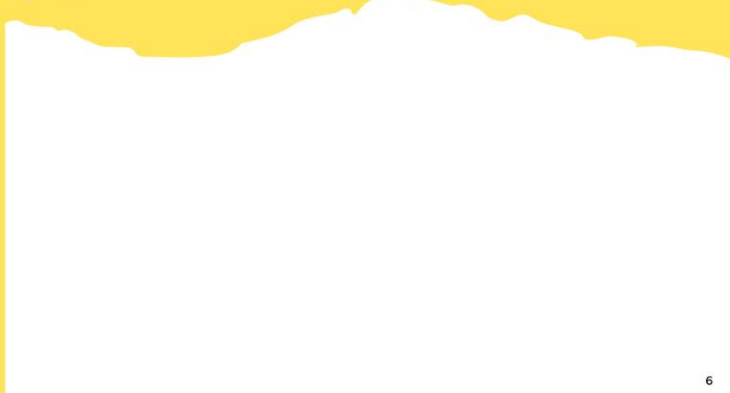

6

“

*I'm doing it  
to look after my health*

”

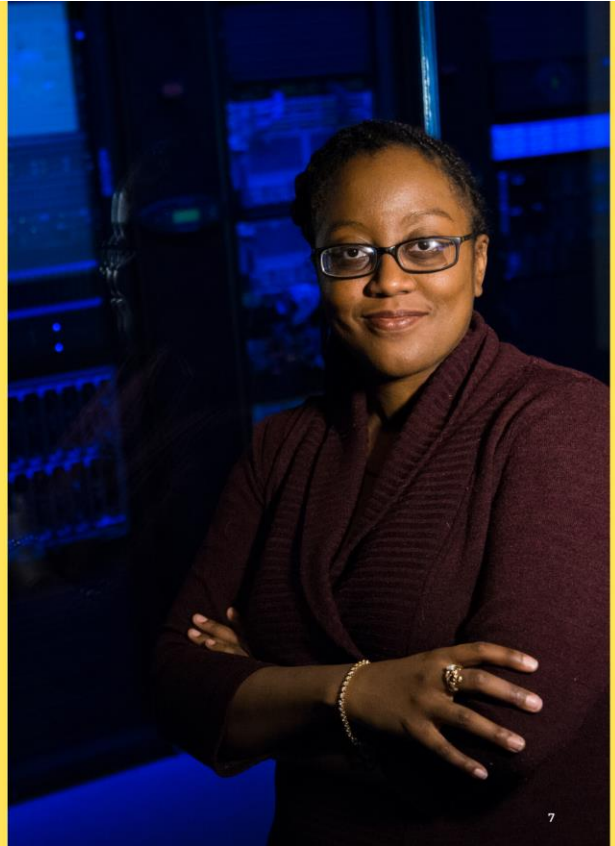

7

# Get focused

## SET YOUR GOALS AND WORK TOWARDS THEM

Breaking up and reducing your sitting at work can seem like a really tough challenge. The key is to think about what you want to achieve and how you are going to do it. This task will help you to set your goals over the short and medium term.

What do you want to achieve?

How will you achieve it?

Short term  
(2 weeks)

How confident are you in achieving this goal? Not at all 1-2-3-4-5-6-7-8-9-10 Very

Medium term  
(2 months)

How confident are you in achieving this goal? Not at all 1-2-3-4-5-6-7-8-9-10 Very

8

# How to change

## YOUR NEXT STEPS FOR SUCCESS

This action plan is your quick guide to success. Make a note of the things you are going to do to break up and reduce your sitting time at work.

What am I going  
to do?

Where am I going  
to do it?

When am I going  
to do it?

Who am I going  
to do it with?

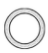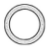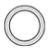

9

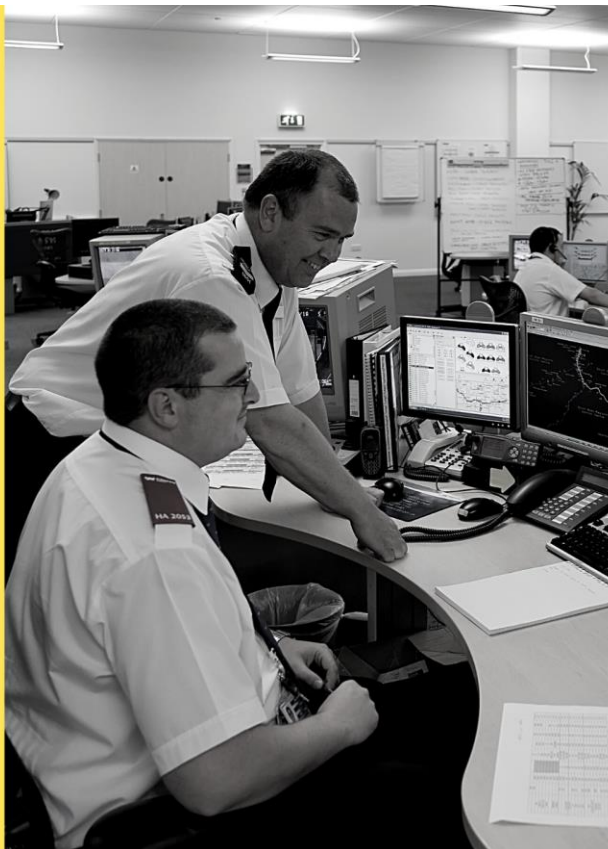

“

*I'm doing it to improve my  
blood pressure*

”

10



## PLANNING IS KEY

# BUMPS IN THE ROAD

Breaking up and reducing sitting time at work is not a smooth ride for anyone. This task will help you plan how to avoid or cope with your bumps in the road and increase your chance of success. Think of difficult situations and how you might avoid/cope with them.

IF...

- 
- 
- 

THEN I WILL...

- 
- 
- 

11

## Benefits of reducing your sitting time

DID YOU KNOW THAT BREAKING UP YOUR SITTING TIME AT WORK CAN...

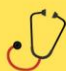

HELP YOU  
MANAGE HIGH  
BLOOD PRESSURE

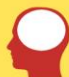

MAKE YOU FEEL GOOD  
AND IMPROVE  
YOUR MENTAL HEALTH

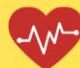

IMPROVE THE HEALTH  
OF YOUR HEART AND  
LOWER YOUR RISK OF A  
HEART ATTACK OR  
STROKE

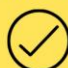

PREVENT DIABETES  
AND HELP YOU  
MANAGE IT BETTER

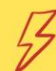

GIVE YOU  
MORE ENERGY

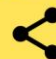

HELPS YOU MEET NEW  
PEOPLE

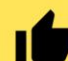

HELP YOU TO MANAGE  
YOUR WEIGHT

12

## SITTING GUIDELINES

# WHAT YOU SHOULD BE AIMING FOR

### BREAK UP YOUR SITTING

- Take frequent, short (3-min) breaks throughout the day
- Very light intensity activities count as breaks
- Aim for 16 breaks in an 8-h workday
- Sit for less than 30-mins at a time

### WHAT COUNTS AS A 'BREAK'?

- A walk to the kitchen or toilets
- Standing to make a cup of tea or coffee
- Pacing while on the phone
- Walking over to talk to a colleague
- Stretching
- Taking the stairs

13

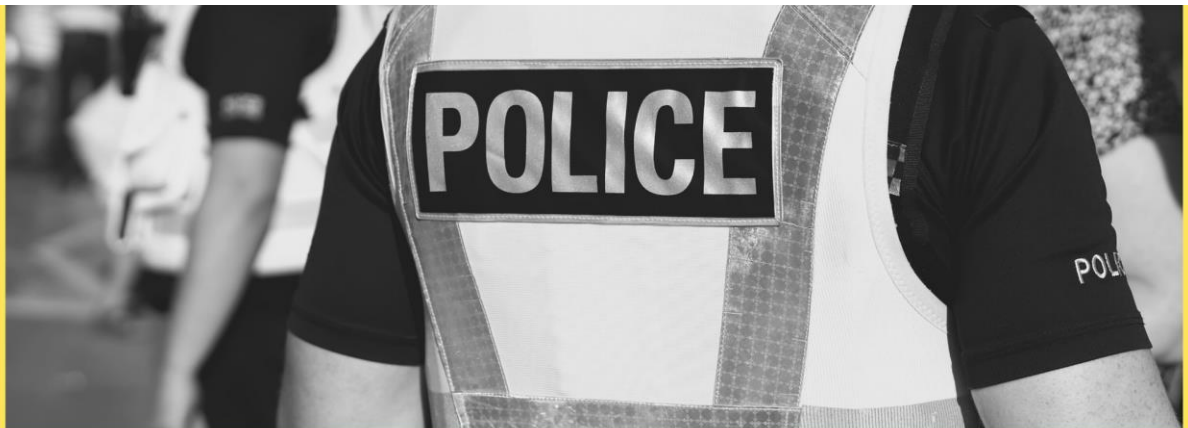

“  
*I'm doing it to  
inspire others*  
”

14



# This is where your path begins

**01**

## WORKSHOP

HERE YOU'LL LEARN ABOUT THE STUDY AND ABOUT THE HEALTH BENEFITS TO BREAKING UP AND REDUCING EXCESSIVE SITTING TIME AT WORK

WORK THROUGH THIS BOOKLET TO SET INDIVIDUAL GOALS

COLLABORATE WITH YOUR COLLEAGUES TO SET TEAM GOALS

ASK QUESTIONS AND GET MOTIVATED!

**02**

## 10-WEEK INTERVENTION

THE AIM OF THE STUDY IS TO HELP YOU REDUCE YOUR SITTING TIME WITH SHORT, FREQUENT BREAKS THROUGHOUT THE WORKDAY (3MINS EVERY HALF HOUR)

LOG YOUR BREAKS WITH YOUR SMARTPHONE BY SCANNING THE QR CODES AROUND THE BUILDING

TRACK YOUR PROGRESS ON THE RISE & RECHARGE® APP

SEE HOW WELL YOUR TEAM IS DOING EACH WEEK ON THE LEADERBOARD

**03**

## SEE YOUR RESULTS

AT THE END OF THE STUDY YOU'LL GET A PERSONAL HEALTH REPORT

DON'T WORRY, WE WON'T SHARE ANY PERSONAL HEALTH DATA WITH YOUR EMPLOYER

15

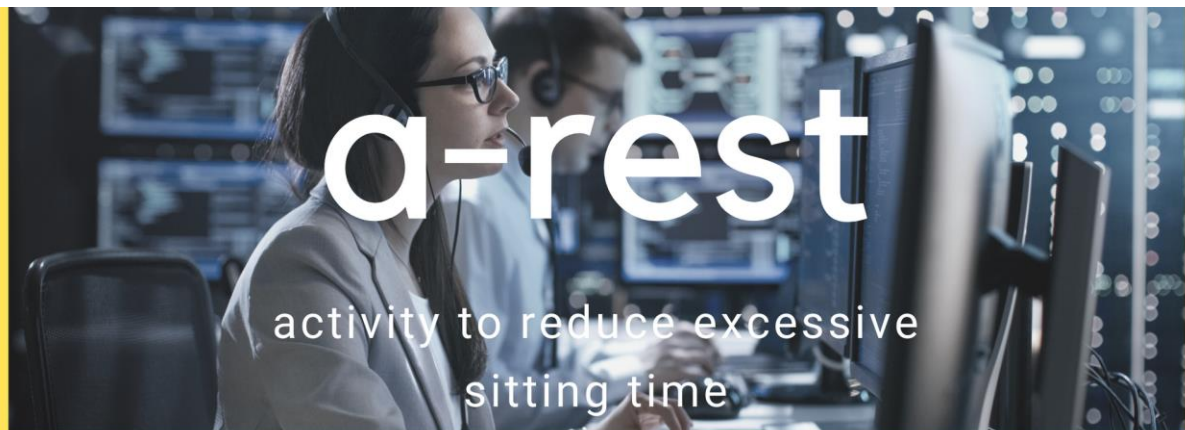

## QUESTIONS?

If you have any questions or run into technical issues, contact details for Marsha Brierley and the research team can be found on page 2.

## BROUGHT TO YOU BY

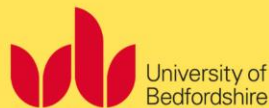

This consultation booklet is adapted from the Active Herts programme ([www.activeherts.org.uk](http://www.activeherts.org.uk))

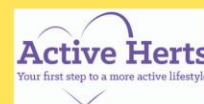

Design by Marsha Brierley 2019

16

#### Supplement 4. Quick response (QR) code and web form example

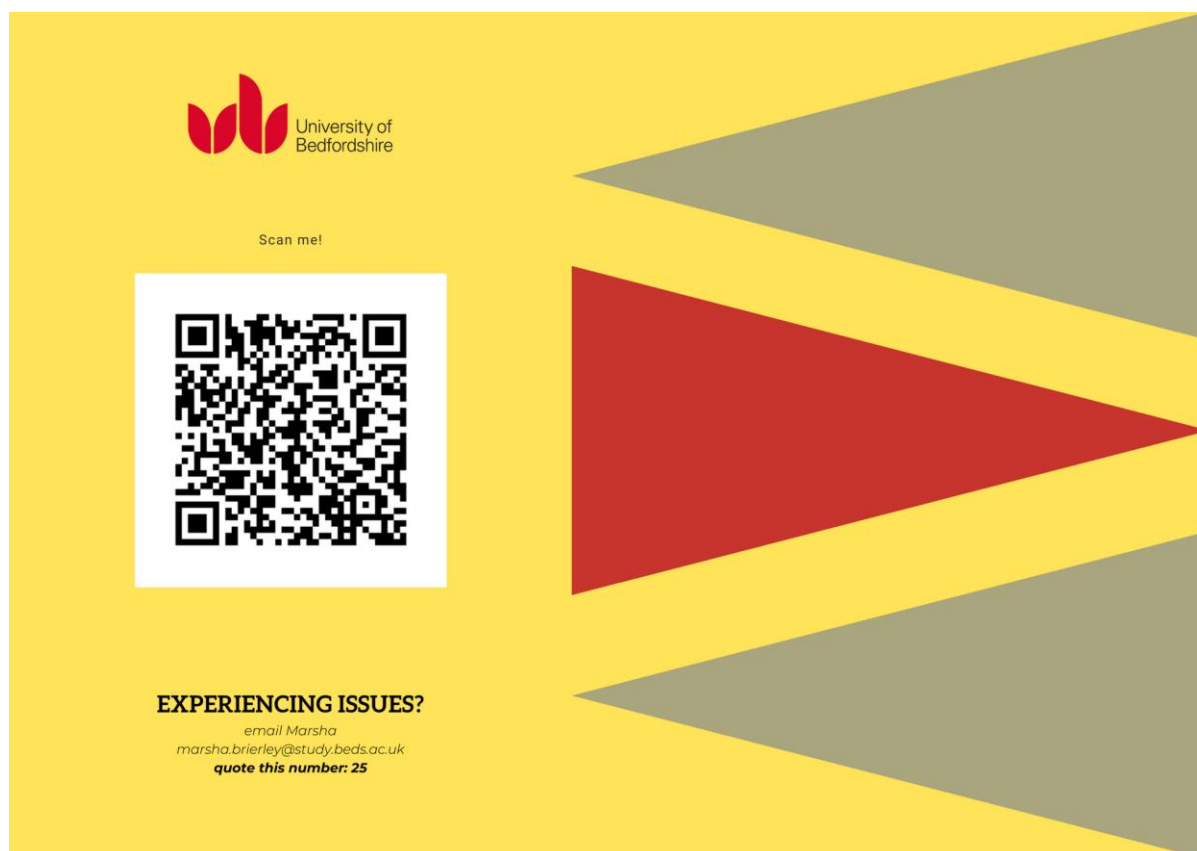

**QR1 - Take a break**

You've just taken a break.

**Please enter your participant ID number**

Your answer

**SUBMIT**

Never submit passwords through Google Forms.

## Supplement 5. Email template for the A-REST study

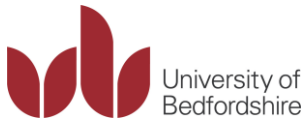

Institute for Sport and Physical Activity Research  
Polhill Avenue  
Bedford  
MK41 9EA

### **A-REST: Activity to Reduce Excessive Sitting**

Dear Team,

This is week [X] of the study.

Here is the weekly leaderboard!

Team leaderboard:

15.5pts– Team 1

14pts– Team 2

13pts – Team 3

[Management approval message example – to be personalised]

During my walk through the office this morning I have noticed that many of you have been taking your breaks. Great effort team!

Other personalisation suggestions:

- restating team goals
- ergonomic tips
- sustainability messages (e.g., these changes are not just for the study)
- state approval for participation
- thanks for participating
- invitations to go to lunch/walk/break
- check in with others

Keep up the good work!

[Signature]

Supplement 6. Post-intervention interview schedule for the A-REST study mapped to the Capability, Opportunity, Motivation, Behaviour (COM-B) model and Theoretical Domains Framework (TDF) (adapted from Ojo, Bailey, Hewson, & Chater, 2019)

Adapted from Ojo et al. (2019)

| COM-B Component |               | TDF Domain                               | Eliciting Questions                                                                                                                                |
|-----------------|---------------|------------------------------------------|----------------------------------------------------------------------------------------------------------------------------------------------------|
| CAPABILITY      | Psychological | Knowledge                                | <i>What is your understanding of guidelines from experts about how much sitting time is okay?</i>                                                  |
|                 |               |                                          | <i>Prompt – At what point do you think sitting becomes too much?</i>                                                                               |
|                 |               |                                          | <i>Prompt – What do you think are the consequences of sitting for long periods?</i>                                                                |
|                 |               |                                          | <i>How do you think your sitting time during the intervention compared with this advice?</i>                                                       |
|                 |               | Memory, Attention and Decision Processes | <i>What aspects of the intervention helped you to overcome barriers that might prevent you from breaking up and reducing your sitting at work?</i> |
|                 |               | Behavioural Regulation                   | <i>What else would need to change to help you break up long periods of sitting at work?</i>                                                        |
|                 | Physical      | Skills                                   | <i>What things during the intervention still prevented you from breaking up and reducing your sitting time at work?</i>                            |
| OPPORTUNITY     | Social        | Social influences                        | <i>How did the people you work with influence your sitting time?</i>                                                                               |
|                 |               |                                          | <i>Prompt – How did the people on your team influence you? (e.g., health champions, and including any electronic communications)</i>               |
|                 |               |                                          | <i>Prompt – How did co-workers not involved in the study influence you?</i>                                                                        |

|            |            |                                       |                                                                                                                                                                                                                                                                                                                             |
|------------|------------|---------------------------------------|-----------------------------------------------------------------------------------------------------------------------------------------------------------------------------------------------------------------------------------------------------------------------------------------------------------------------------|
|            |            |                                       | <i>How else could your work colleagues and employer help you to break up and reduce your sitting time?</i>                                                                                                                                                                                                                  |
|            | Physical   | Environmental context and Resources   | <i>How did the change in your environment at work influence your sitting behaviour? (e.g., QR codes, computer prompts)</i><br><i>How else would your environment need to change to make breaking up and reducing sitting easier for you?</i>                                                                                |
| MOTIVATION | Reflective | Beliefs about Capabilities            | <i>How confident were you at the start of the intervention that you could break up your sitting time? On a scale of 1 to 10. Why [insert number] and not 1?</i><br><i>How confident are you that you could continue to break up your sitting time going forwards? On a scale of 1 to 10. Why [insert number] and not 1?</i> |
|            |            | Beliefs about Consequences            | <i>How much benefit do you feel breaking up your sitting time gave you?</i>                                                                                                                                                                                                                                                 |
|            |            | Goal                                  | <i>Describe your personal and team goals during the intervention</i>                                                                                                                                                                                                                                                        |
|            |            | Intention                             | <i>How did your determination to break up sitting time progress throughout the intervention?</i>                                                                                                                                                                                                                            |
|            |            | Optimism                              | <i>How optimistic were you during the intervention that you could reduce your sitting time? Why is that?</i>                                                                                                                                                                                                                |
|            |            | Professional/social role and identity | <i>Thinking about your professional role in policing, what are the positives and negatives of sitting in the workplace?</i><br><i>Prompt – How are you perceived by others when you sit, stand, don't sit, don't stand?</i><br><i>Prompt – How do you perceive yourself when you sit, stand, don't sit, don't stand?</i>    |
|            | Automatic  | Emotion                               | <i>How do you think your mood during the day influenced your sitting patterns?</i>                                                                                                                                                                                                                                          |
|            |            | Habits & routines                     | <i>What about your habits?</i><br><i>How could the intervention address these (mood &amp; habits) to break up and reduce your sitting time at work?</i>                                                                                                                                                                     |

Reinforcement

---

*In what ways did the intervention reinforce breaking up and reducing sitting time?*

---

PRACTICABILITY (FIDELITY)

- Did you attend a workshop in the beginning? How useful was it to you?
- Were you aware of the booklet? How useful was it to you?
- Were you aware of the emails?
- Were you aware of the QR code competition?
- Were you aware of where the QR codes were located?
- How useful was the rise & recharge app (to track your behaviour)?
- How did you remember to break up your sitting time (app, kept eye on the clock, etc., alarm or someone else's alarm)?
- How did you find the 8-week timeframe?
- Data collection?
- Were you aware that you would receive a health report at the end?
- Is there anything else you'd like to say about your experience of the intervention, the QR codes, or data collection process?

Supplement 7. Table showing changes in daily sitting, standing, and stepping (normalised to a 16-hour waking day) from baseline to end of intervention (n=17).

| Variable                                  | Baseline |                    | End of intervention |                    | Mean difference |                   | Effect size |      |
|-------------------------------------------|----------|--------------------|---------------------|--------------------|-----------------|-------------------|-------------|------|
|                                           | mean     | 95% CI             | mean                | 95% CI             |                 | 95% CI            | P           | (d)  |
| Sitting time (minutes)                    | 630.71   | 586.57, 674.86     | 650.76              | 609.69, 691.83     | 20.04           | -13.64, 53.73     | 0.23        | 0.24 |
| Sitting time (%)                          | 65.70    | 61.10, 70.30       | 67.79               | 63.51, 72.07       | 2.09            | -1.42, 5.60       | 0.23        | 0.24 |
| Standing time (minutes)                   | 235.72   | 196.46, 274.97     | 223.52              | 186.17, 260.88     | -12.19          | -36.35, 11.97     | 0.30        | 0.16 |
| Standing time (%)                         | 24.55    | 20.46, 28.64       | 23.28               | 19.39, 27.18       | -1.27           | -3.79, 1.25       | 0.30        | 0.16 |
| Time in prolonged sitting bouts (minutes) | 384.29   | 332.30, 436.27     | 364.91              | 324.16, 405.67     | -19.37          | -67.39, 28.64     | 0.40        | 0.21 |
| Time in prolonged sitting bouts (%)       | 40.03    | 34.61, 45.45       | 38.01               | 33.77, 42.26       | -2.02           | -7.02, 2.98       | 0.40        | 0.21 |
| Number of prolonged sitting bouts         | 6.97     | 6.17, 7.78         | 6.81                | 6.08, 7.54         | -0.16           | -1.00, 0.67       | 0.68        | 0.11 |
| Number of sit-upright transitions         | 46.08    | 41.85, 50.31       | 48.51               | 44.22, 52.80       | 2.43            | -2.09, 6.95       | 0.27        | 0.29 |
| Stepping time (minutes)                   | 93.57    | 80.30, 106.84      | 85.72               | 76.89, 94.54       | -7.85           | -21.35, 5.65      | 0.24        | 0.36 |
| Number of Steps                           | 7863.39  | 6,641.96, 9,084.81 | 7027.51             | 6,170.78, 7,884.24 | -835.87         | -2,060.15, 388.41 | 0.17        | 0.41 |

NOTE: CI = confidence interval. The analysis was conducted using 17 complete datasets (activPAL data provided both at baseline and follow-up) as missing data were excluded case-wise.
